# Supplementary material for: Assembly of ultrathin PbBiO2Br nanosheets with enhanced visible light photocatalytic properties
Source: Royal Society of Chemistry journal article supplement (doi:10.1039/c3ra41324a), 2013-01-01
Supplement: c3ra41324a.pdf [file c3ra41324a.pdf]

## Supporting Information

### Assembly Ultrathin PbBiO<sub>2</sub>Br Nanosheets With Enhanced Visible Light Photocatalytic Property

Fang Yuan Xiao,<sup>a</sup> Jun Xing,<sup>a</sup> Long Wu,<sup>a</sup> Zu Peng Chen,<sup>a</sup> Xue Lu Wang<sup>a</sup>  
& Hua Gui Yang<sup>\*a,b</sup>

<sup>a</sup> *Key Laboratory for Ultrafine Materials of Ministry of Education, School of Materials Science and Engineering, East China University of Science and Technology, 130 Meilong Road, Shanghai 200237, China.*

<sup>b</sup> *Centre for Clean Environment and Energy, Gold Coast Campus, Griffith University, Queensland 4222, Australia*

*\*Corresponding author: Tel.: +86-21-64252127, Fax: +86-21-64252127*

*E-mail address: hgyang@ecust.edu.cn*

## Experimental section

**Synthesis of PbBiO<sub>2</sub>Br nanosheets samples.** Assembly ultrathin PbBiO<sub>2</sub>Br nanosheets samples were synthesized using a solvothermal method. In a typical procedure, 0.5mmol Bi(NO<sub>3</sub>)<sub>3</sub>•5H<sub>2</sub>O were added into 20mL of ethanol containing stoichiometric amounts of hexadecyl trimethyl ammonium bromide (CTAB) and Pb(NO<sub>3</sub>)<sub>2</sub> with continuous stirring, and then 5mL ammonia water were added into this solution. The mixture solution was stirred for at least 30min and then poured into a 50mL Teflon-lined stainless autoclave. The autoclave was heated at 180°C for 12 h under autogenously pressure and then cooled to room temperature. The resulting precipitates were collected and washed with ethanol and deionized water thoroughly and dried at 70°C in air. For comparison, further experiments were performed under different synthesis conditions, and the details are shown in the Table 1.

**Table1** The synthesis conditions of reference PbBiO<sub>2</sub>Br samples.

| Precursor                                   | Sample1(S1) | Sample2 (S2) | Sample3 (S3)    | Sample4 (S4) |
|---------------------------------------------|-------------|--------------|-----------------|--------------|
| <b>Bi(NO<sub>3</sub>) • 5H<sub>2</sub>O</b> | 1mmol       | 0.25 mmol    | 0.5 mmol        | 0.5 mmol     |
| <b>Pb(NO<sub>3</sub>)<sub>2</sub></b>       | 1mmol       | 0.25 mmol    | 0.5 mmol        | 0.5 mmol     |
| <b>CTAB</b>                                 | 1mmol       | 0.25 mmol    | 0.5 mmol        |              |
| <b>KBr</b>                                  |             |              |                 | 0.5 mmol     |
| <b>solvent</b>                              | ethanol     | ethanol      | distilled water | ethanol      |
| <b>ammonia water</b>                        | 5 mL        | 5 mL         | 5 mL            | 5 mL         |

**Synthesis of bulk PbBiO<sub>2</sub>Br samples.** BiOBr and PbO (AR, 99.5%) were used as starting materials. BiOBr was prepared by a soft chemical method described elsewhere.<sup>1</sup> These two raw materials were mixed in a molar ratio of 1:1. Handing grinding using a mortar and pestle was performed for at least 40 minutes to guarantee a homogeneous mixing and then the mixture was calcined in air at 973 K for 20 h. For comparison, TiO<sub>2-x</sub>N<sub>x</sub>, C<sub>3</sub>N<sub>4</sub> and BiOBr are used as the reference photocatalyst, which were obtained according to previously reports.<sup>2</sup>

1. H. Cheng, B. Huang, P. Wang, Z. Wang, Z. Lou, J. Wang, X. Qin, X. Zhang and Y. Dai, *Chemical Communications*, 2011, **47**, 7054-7056.
2. Z. Zhao, J. Fan, J. Wang and R. Li, *Catalysis Communications*, 2012, **21**, 32-37.

**Photocatalytic Activity Test.** The photocatalytic activity experiments of the products for the degradation of methyl orange (MO) were performed at ambient temperature using a 350 W Xe arc lamp with a 420 nm cutoff filter as the light source. The distance between the liquid surface of the suspension and the light source was about 10 cm. Typically, 0.05 g photocatalysts were added into 50 mL of 10 mg L<sup>-1</sup> MO aqueous solution in a container. Prior to irradiation, the suspensions were stirred in the dark for 1 h to ensure the adsorption/desorption equilibrium. At the given time intervals, about 5 mL suspension were taken for the following analysis after centrifugation. The MO photodegradation was then analyzed on a UV-vis spectrophotometer (UV-2012PC).

**Materials characterizations.** The crystal structure was determined using X-ray diffraction (XRD, Bruker D8 Advanced Diffractometer with Cu K $\alpha$  radiation). The morphology and structure of the samples were characterized by high-resolution transmission electron microscopy and selected area electron diffraction (HRTEM/SAED, JEOL JEM-2100), and field emission scanning electron microscopy (FESEM, HITACHI S4800). The optical absorbance spectra were recorded in a UV/vis spectrophotometer (CARY 500). The photoluminescence (PL) spectra were acquired at room temperature with a UV-VIS-NIR fluorescence spectrophotometer (Fluorolog-3-P) under the ultraviolet excitation of 491 nm.

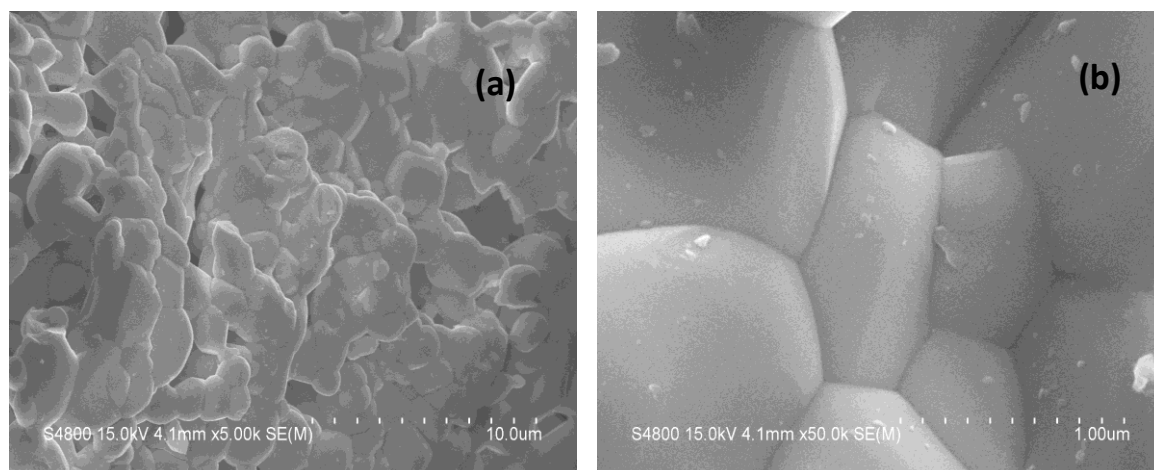

**Fig. S1** SEM images of bulk  $\text{PbBiO}_2\text{Br}$  samples.

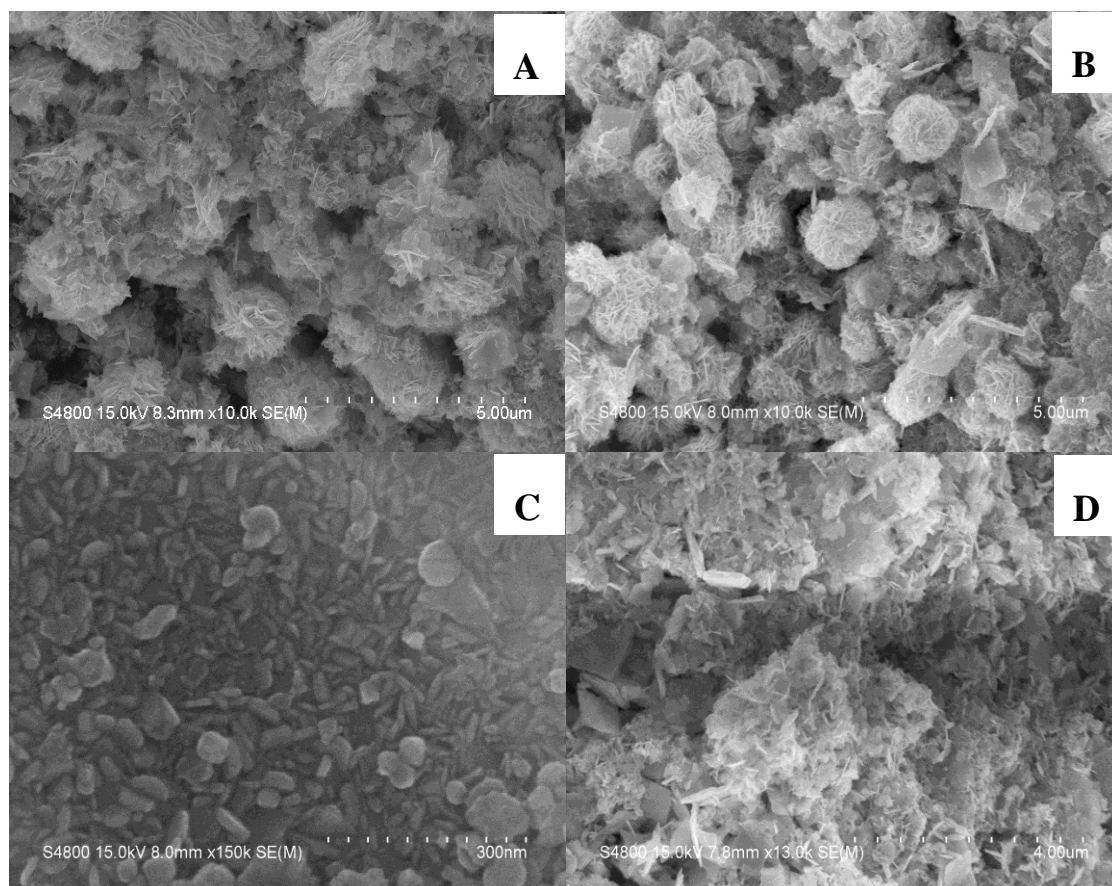

**Fig. S2** SEM images of reference  $\text{PbBiO}_2\text{Br}$  samples. A) S1, B) S2, C) S3, D) S4.

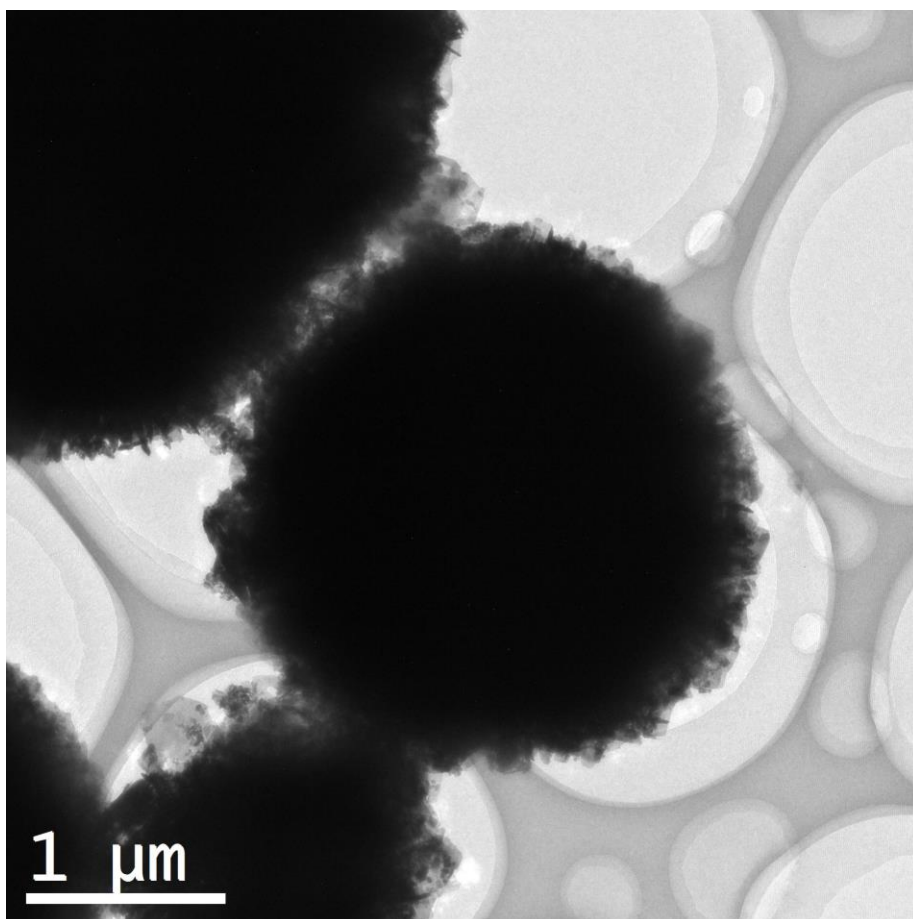

**Fig. S3** TEM image of PbBiO<sub>2</sub>Br hierarchical microspheres.

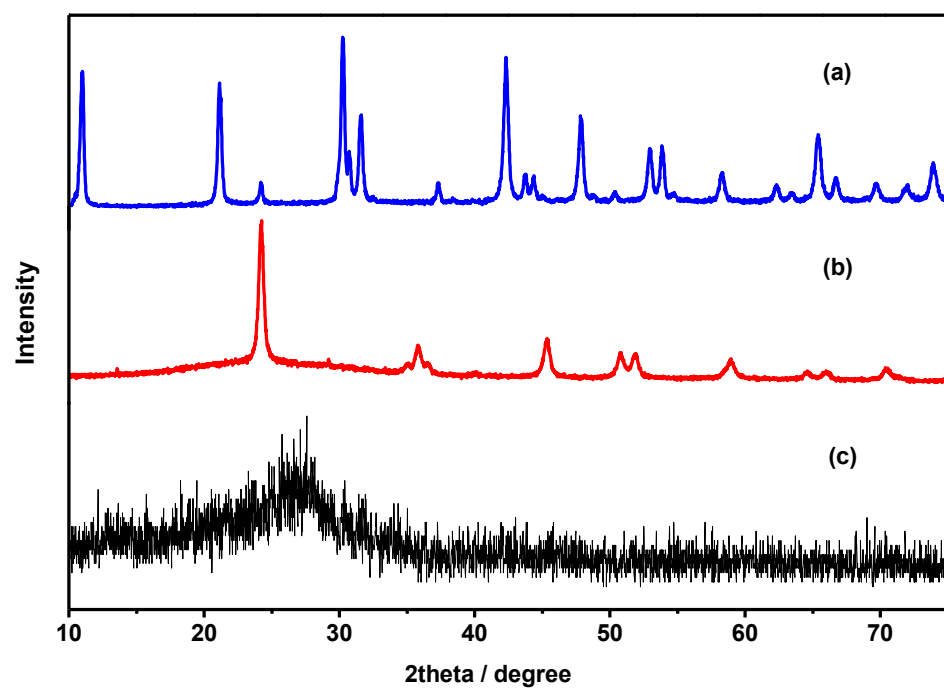

**Fig. S4** XRD patterns of (a) BiOBr, (b) TiO<sub>2-x</sub>N<sub>x</sub>, and (c) C<sub>3</sub>N<sub>4</sub>.

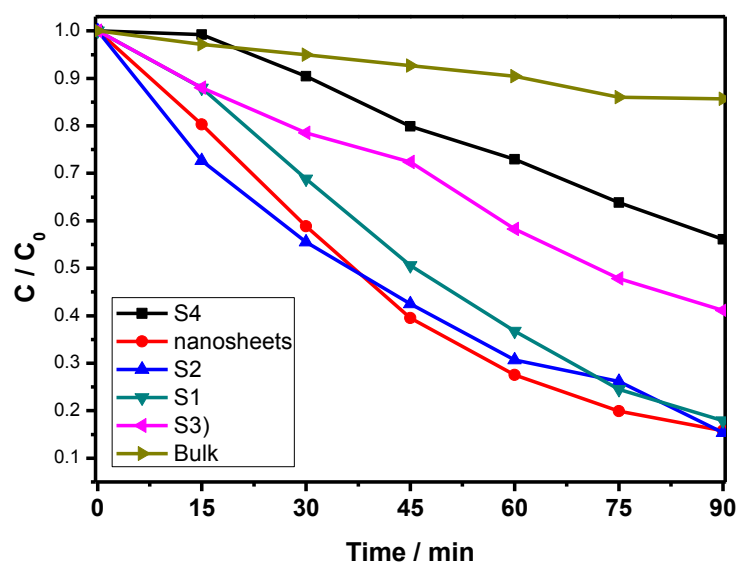

**Fig. S5** The MO normalization concentration in the solution with different  $\text{PbBiO}_2\text{Br}$  versus the exposure time under visible light ( $\lambda > 420 \text{ nm}$ ).



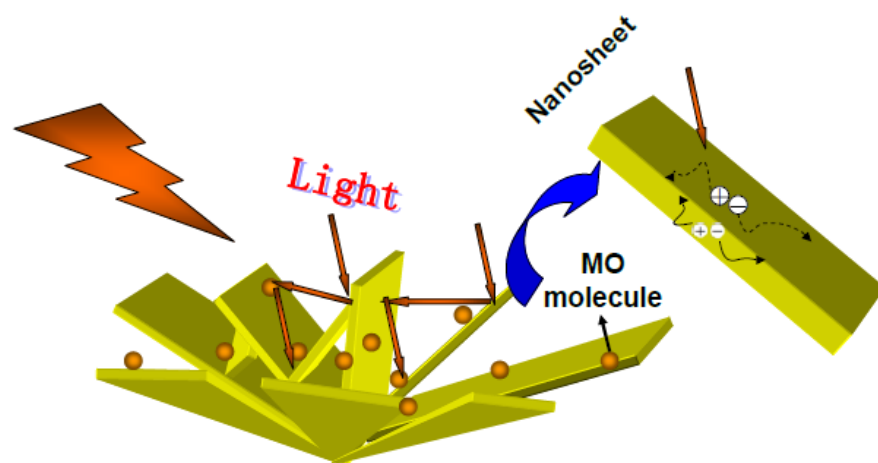

**Fig. S6** Schematic illustration of photocatalytic degradation MO on hierarchical  $\text{PbBiO}_2\text{Br}$ .

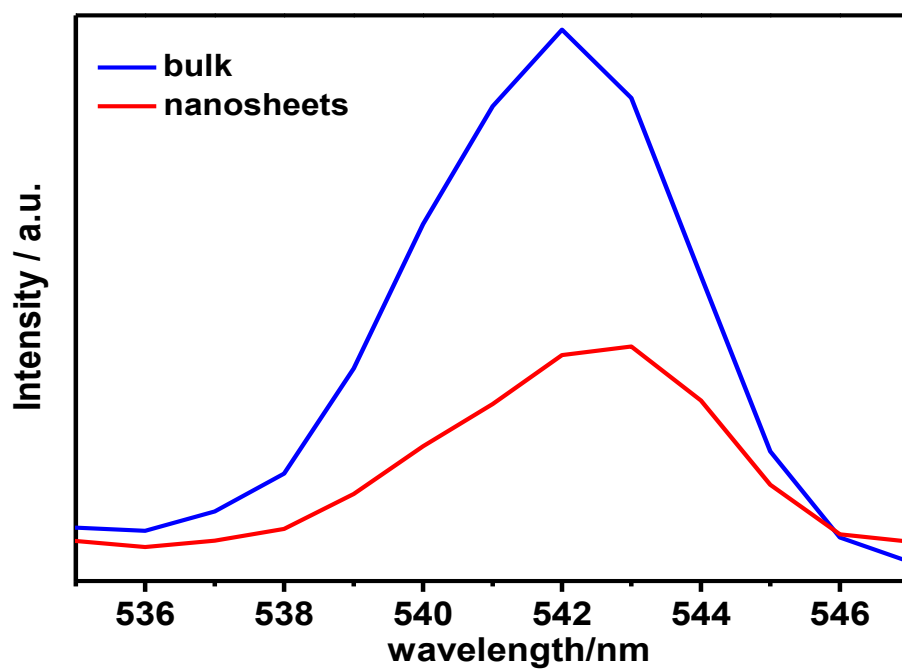

**Fig. S7** PL emission spectra of the bulk PbBiO<sub>2</sub>Br and PbBiO<sub>2</sub>Br nanosheets.
